# Supplementary material
Source: MDPI journal article supplement (https://www.mdpi.com/2071-1050/9/7/1182)
Supplement: s1 [file s1]

For the benefit of researchers and scholars who are familiar with the Korean language or the subject, we have provided proverbs both in English and Korean in this supplemental material.

| Proverbs in English                                                                         | Proverbs in Korean                    |
|---------------------------------------------------------------------------------------------|---------------------------------------|
| Proverbs in Table 1                                                                         |                                       |
| 1. If the pine shoot grows tall, comes a bumper year                                        | 1. 소나무 새순이 길게 자라면 풍년 든다               |
| 2. Pine tree protects the field alone                                                       | 2. 소나무는 홀로 그 절개를 지킨다                  |
| 3. Straight personality like a bamboo tree                                                  | 3. 성미가 꼳꼳하기는 대나무다                     |
| 4. Ginkgoes should stand face to face to bear fruits                                        | 4. 은행나무도 마주서야 연다                      |
| 5. Even trees get sick for 3 years when transplanted to another place                       | 5. 나무도 옮겨 심으면 3년은 뿌리를 앓는다             |
| 6. When mountain cries the field smiles, and when field cries the mountain smiles           | 6. 산이 울면 들이 웃고, 들이 울면 산이 웃는다          |
| 7. If a bird on a persimmon tree is unseen, it's late to prepare a rice seed plot           | 7. 감나무 가지에 새가 앉아 안 보이면 못자리가 늦다        |
| 8. If a big shade tree of a village is cut, the village will be devastated                  | 8. 마을의 큰 정자나무를 베면 동네가 망한다             |
| 9. It is said that after giving birth to a baby girl, one should plant a paulownia tree     | 9. 딸 낳으면 오동나무 먼저 심으랬다                 |
| 10. A mountain god will bless you if you save firewood                                      | 10. 나무를 아껴 때면 산신령이 복을 준다              |
| Proverbs in Table 3                                                                         |                                       |
| 1. If there are many trees on the island, there are many fishes                             | 1. 섬에 나무가 많으면 고기도 많다                  |
| 2. If the pine shoot grows tall, comes a bumper year                                        | 2. 소나무 새순이 길게 자라면 풍년 든다               |
| 3. Trees don't benefit from big trees (while people benefit from big people)                | 3. 나무는 큰 나무의 덕을 못 보아도 사람은 큰 사람의 덕을 본다 |
| 4. If clouds strangle a mountain's neck, it rains                                           | 4. 구름이 산 목을 조이면 비가 온다                 |
| 5. Even trees get sick for three years, when transferred to another place                   | 5. 나무도 옮겨 심으면 삼 년은 뿌리를 앓는다            |
| 6. Forests can't tame pheasants and ponds can't raise crabs                                 | 6. 숲에서는 꿩을 길들이지 못하며 못에서는 게를 기르지 못한다   |
| 7. The ground dries when Chubun has passed                                                  | 7. 추분이 지나면 땅 위에 물기가 마른다               |
| 8. When the mountain cries, the field smiles, and when the field cries, the mountain smiles | 8. 산이 울면 들이 웃고, 들이 울면 산이 웃는다          |
| 9. When cutting one tree, plant ten trees                                                   | 9. 나무 한 대를 베면 열 대를 심으라                |
| 10. Peach tree bats for the ghosts                                                          | 10. 귀신에 복숭아나무 방망이                     |
| 11. Housewives first sense the rain                                                         | 11. 비오는 것은 밥 짓는 부인이 먼저 안다             |
| 12. Housewives become generous when it rains in spring                                      |                                       |
| 13. Ants distract a shade tree                                                              |                                       |
| 14. The mountain god gives blessing when you conserve wood                                  |                                       |

12. 봄비가 많이 오면 아낙네 손이 커진다
13. 개미가 정자나무 건드린다
14. 나무를 아껴 때면 산신령이 복을 준다

Proverbs in Table 4

- |                                                                            |                                      |
|----------------------------------------------------------------------------|--------------------------------------|
| 1. It will rain if ants move in a line                                     | 1. 가뭄 때 개미가 떼지어 이동하면 비가 온다           |
| 2. It will rain if ants cross a road                                       | 2. 개미가 거동하면 비가 온다                    |
| 3. It will rain if green frogs sing                                        | 3. 개구리가 요란스럽게 울면 비가 온다               |
| 4. It will rain if seagulls fly near the ground                            | 4. 제비가 땅을 스치며 낮게 날면 비가 온다            |
| 5. It will rain if seagulls fly low                                        | 5. 갈매기가 낮게 날면 비가 온다                  |
| 6. It will rain if a group of spiders pass by during a drought             | 6. 가뭄 때 거미 떼가 지나가면 비가 올 징조다          |
| 7. It will stop raining when spiders start spinning their webs             | 7. 거미가 줄을 치면 날씨가 좋다 (비가 그친다)         |
| 8. It will rain if cats get worked up                                      | 8. 고양이가 소란을 피우면 비가 올 징조다             |
| 9. It will rain if bells sound clear                                       | 9. 종소리가 똑똑히 들리면 비가 올 징조다             |
| 10. It will rain if there are bubbles in ponds, lakes, and streams         | 10. 연못, 늪, 하천에 거품이 많이 일면 머지 않아 비가 온다 |
| 11. It will rain soon if wind blows from the south                         | 11. 남풍이 불면 곧 비가 온다                   |
| 12. It will rain if there is a ring around the sun and the moon            | 12. 달무리나 햇무리가 생기면 비가 온다              |
| 13. It will rain if smoke does not go outside (and stays inside the house) | 13. 연기가 잘 안 빠지면 비가 온다                |
| 14. It will rain heavily if there is thunder in the morning                | 14. 아침에 내리는 뇌우는 큰 비가 올 징조다           |

Proverbs in Table 5

- |                                                                                                               |                              |
|---------------------------------------------------------------------------------------------------------------|------------------------------|
| 1. The stick buried in <i>Ipchun</i> snows                                                                    | 1. 입춘날 내린 눈 작대기 잠긴다          |
| 2. Heavy <i>usu</i> rains bring a plentiful harvest                                                           | 2. 우수에는 비가 많이 와야 풍년이 든다      |
| 3. West wind on <i>chunbun</i> will bring a bad barley harvest                                                | 3. 춘분에 서풍이 불면 보리 흉년 든다       |
| 4. South wind on <i>cheong-myeong</i> brings a good harvest                                                   | 4. 청명에 남풍이 불면 풍년 든다          |
| 5. A wet <i>gok-u</i> makes a plentiful harvest, and a dry one brings a bad harvest                           | 5. 곡우에 비가 오면 풍년 들고 가뭄면 흉년 든다 |
| 6. Trapped water on <i>ipha</i> , and even plowing with a manure-covered plowshare will not save your harvest |                              |

- 
7. *Mangjong* droughts are like your debt collectors
  8. After *haji*, clouds are a suggestion of rain
  9. Wet feet after *haji*
  10. Check the *soseo* rains before planting the *cheonbong-jigi* paddies
  11. Rainfall on *ipchu* is essential for a good vegetable harvest
  12. Little *ipchu* rain brings a good harvest, whereas heavy rains harm the rice
  13. *Cheoseo* rains mean less grain in the pot
  14. The summer rains leave with *baekro*
  15. *Baekro* rains mean a bad harvest
  16. The ground dries when *chubun* has passed
  17. Heavy snow on *dongji* brings heavy rains in May and June

6. 입하에 물 잡으면 보습에 개똥을 발라 갈아도 안된다
  7. 망종 가뭄은 꺾다 해도 한다
  8. 하지가 지나면 구름 장맛비
  9. 하지가 지나면 밭을 물에 담그고 산다
  10. 소서 물보고 천봉지기에 모 심는다
  11. 입추 때 비가 와야 채소가 풍년든다
  12. 입추에 비가 조금 오면 풍년들고, 많이 오면 벼를 상운다
  13. 처서에 비가 오면 단지의 곡식이 준다
  14. 백로가 지나면 장마도 끝난다
  15. 백로에 비가 오면 흉년이 든다
  16. 추분이 지나면 땅 위에 물기가 마른다
  17. 동지섣달에 눈이 많이 오면 오뉴월에 비가 많이 온다
-
